# Supplementary material for: Using YouTube to Disseminate Effective Vaccination Pain Treatment for Babies
Source: PubMed Central journal article supplement (PMC5047634; doi:10.1371/journal.pone.0164123), 2016-10-03

CREATOR STUDIO

The demographics report has had a makeover to allow deeper insights. Learn more

DASHBOARD

VIDEO MANAGER

LIVE STREAMING

COMMUNITY

CHANNEL

ANALYTICS

Overview

Realtime

Revenue reports

Revenue

Ad rates

Watch time reports

Watch time

Audience retention

Demographics

Playback locations

Traffic sources

Devices

Engagement reports

Subscribers

Likes and dislikes

Videos in playlists

Comments

Sharing

Annotations

Cards

CREATE

Help and feedback

Overview

Comparison...

Groups ▾

Export report ▾

Baby vaccination; the secret to a calm and peac

Search for locations

First 365 days ▾

Subscribed & not subscribed ▾

All YouTube products ▾

CHEOvideos >

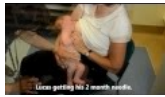

Baby vaccination; the secret to a calm and peaceful immunization

Created: Oct 21, 2013 • Duration: 1:36 • Privacy setting: Public

VIDEO

First 365 days (Oct 21, 2013 – Oct 20, 2014)

Watch time

Minutes

67,862 ▲

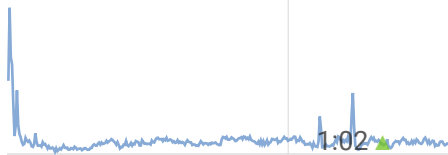

Average view duration

Minutes

1:02 ▲

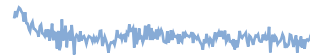

Views

65,478 ▲

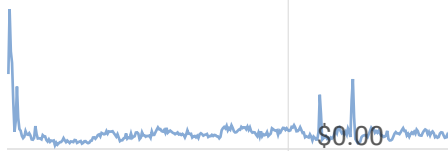

Your estimated revenue \*

\$0.00

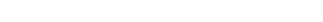

Likes

82

Dislikes

17

Comments

42 ▲

Shares \*

65

Videos in playlists \*

40

Subscribers

11

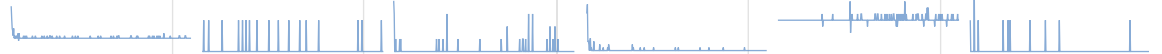

Top geographies

Watch time

- United States (24%)
- Canada (16%)
- Saudi Arabia (6.4%)
- United Kingdom (4.2%)
- India (3.7%)

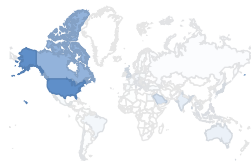

Gender

Views

- Male (43%)
- Female (57%)

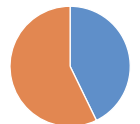

Traffic sources

Watch time

- Suggested videos (37%)
- Direct or unknown (25%)
- YouTube search (19%)
- Other (19%)

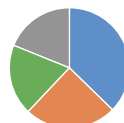

Playback locations

Watch time

- YouTube watch page (88%)
- Embedded in external websites and apps (12%)
- YouTube other (0.2%)
- Other (0.0%)

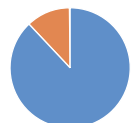

Skip navigation

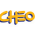

Supplement: pone.0164123.s001.pdf [file pone.0164123.s001.pdf]
