# Supplementary material for: Using YouTube to Disseminate Effective Vaccination Pain Treatment for Babies
Source: PLoS One. 2016 Oct 3;11(10):e0164123. doi: 10.1371/journal.pone.0164123 (PMC5047634; doi:10.1371/journal.pone.0164123)
Supplement: S1 Table — Raw survey data from parents and health care providers. (XLSX) [file pone.0164123.s002.xlsx]

## Sheet: Parent Data
							How did you find this video? (check all that apply)
Participant ID	Date and time completed	Are you a health care provider or parent?	Have you / your partner ever breastfed your baby during immunizations?	After viewing this video, would you ask your doctor / nurse if you / your partner could breastfeed your baby during immunizations?	Has your baby ever been given sucrose or glucose for immunizations?	After viewing this video, would you ask your nurse / doctor if sucrose or glucose could be given before your baby's immunizations?	Searching YouTube	Family Friend	Health Care Professional	Facebook/Twitter/Email	CHEO website	Other
2	2013-10-21 10:10:50	Parent	Yes	Yes	No	Yes	Unchecked	Unchecked	Unchecked	Checked	Unchecked	Unchecked
6	2013-10-21 11:42:06	Parent	Yes	Yes	No	Yes	Unchecked	Checked	Unchecked	Checked	Unchecked	Unchecked
7	2013-10-21 11:45:34	Parent	No	No	Yes	Yes	Unchecked	Checked	Checked	Unchecked	Unchecked	Unchecked
8	2013-10-21 12:05:50	Parent	No	Yes	No	No	Unchecked	Unchecked	Unchecked	Checked	Unchecked	Unchecked
12	2013-10-21 15:19:55	Parent	No	Yes	No	Yes	Unchecked	Checked	Unchecked	Checked	Unchecked	Unchecked
13	2013-10-21 15:52:02	Parent	No	Yes	No	Yes	Unchecked	Checked	Unchecked	Unchecked	Unchecked	Unchecked
15	2013-10-21 19:22:06	Parent	No	Yes	No	Yes	Unchecked	Unchecked	Unchecked	Checked	Checked	Checked
16	2013-10-21 19:40:39	Parent	No	Yes	No	Yes	Unchecked	Checked	Unchecked	Unchecked	Unchecked	Unchecked
17	2013-10-21 20:04:54	Parent	Yes	Yes	Yes	Yes	Unchecked	Checked	Unchecked	Checked	Unchecked	Unchecked
18	2013-10-21 20:13:49	Parent	No	Yes	Yes	Yes	Unchecked	Checked	Unchecked	Checked	Unchecked	Unchecked
19	2013-10-21 20:55:51	Parent	Yes	Yes	No	Yes	Unchecked	Unchecked	Unchecked	Checked	Unchecked	Unchecked
22	2013-10-22 05:10:07	Parent	No	Yes	No	Yes	Unchecked	Unchecked	Unchecked	Checked	Unchecked	Unchecked
23	2013-10-22 09:06:56	Parent	Yes	Yes	No	Yes	Unchecked	Unchecked	Unchecked	Checked	Unchecked	Unchecked
24	2013-10-22 09:23:35	Parent	No	No	Yes	Yes	Unchecked	Unchecked	Checked	Unchecked	Unchecked	Unchecked
33	2013-10-22 13:48:29	Parent	No	Yes	No	No	Unchecked	Unchecked	Unchecked	Checked	Unchecked	Unchecked
35	2013-10-22 14:54:33	Parent	No	Yes	No	Yes	Unchecked	Unchecked	Unchecked	Checked	Unchecked	Unchecked
38	2013-10-22 17:20:35	Parent	No	Yes	No	Yes	Unchecked	Unchecked	Unchecked	Unchecked	Unchecked	Checked
39	2013-10-22 18:12:56	Parent	No	Yes	No	Yes	Unchecked	Unchecked	Unchecked	Checked	Unchecked	Unchecked
41	2013-10-22 19:29:11	Parent	Yes	Yes	No	No	Unchecked	Unchecked	Checked	Unchecked	Unchecked	Unchecked
45	2013-10-22 21:08:06	Parent	Yes	Yes	No	No	Unchecked	Unchecked	Unchecked	Unchecked	Unchecked	Checked
46	2013-10-22 21:25:46	Parent	Yes	Yes	No	No	Unchecked	Unchecked	Checked	Unchecked	Unchecked	Unchecked
49	2013-10-22 22:35:34	Parent	Yes	Yes	No	Yes	Unchecked	Unchecked	Unchecked	Checked	Unchecked	Unchecked
52	2013-10-23 08:46:45	Parent	No	Yes	Yes	Yes	Unchecked	Checked	Unchecked	Unchecked	Unchecked	Unchecked
53	2013-10-23 10:15:32	Parent	Yes	Yes	No	Yes	Unchecked	Unchecked	Unchecked	Unchecked	Unchecked	Checked
59	2013-10-23 12:46:40	Parent	No	Yes	No	Yes	Unchecked	Unchecked	Unchecked	Checked	Checked	Unchecked
64	2013-10-23 23:01:38	Parent	No	Yes	No	Yes	Unchecked	Unchecked	Checked	Unchecked	Unchecked	Unchecked
65	2013-10-23 23:28:42	Parent	Yes	Yes	No	Yes	Unchecked	Checked	Unchecked	Unchecked	Unchecked	Unchecked
68	2013-10-24 10:08:22	Parent	No	Yes	Yes	Yes	Unchecked	Unchecked	Checked	Unchecked	Unchecked	Unchecked
73	2013-10-24 13:53:38	Parent	No	Yes	No	Yes	Unchecked	Checked	Unchecked	Unchecked	Unchecked	Unchecked
74	2013-10-24 15:09:26	Parent	Yes	Yes	No	No	Unchecked	Unchecked	Unchecked	Unchecked	Unchecked	Checked
75	2013-10-24 17:37:18	Parent	No	Yes	No	Missing	Unchecked	Unchecked	Checked	Unchecked	Unchecked	Unchecked
80	2013-10-25 04:20:36	Parent	No	No	No	No	Checked	Unchecked	Unchecked	Unchecked	Unchecked	Unchecked
82	2013-10-25 11:02:51	Parent	Yes	No	No	No	Unchecked	Checked	Unchecked	Checked	Unchecked	Unchecked
88	2013-10-29 21:23:08	Parent	No	Yes	No	Yes	Unchecked	Unchecked	Checked	Unchecked	Unchecked	Unchecked
90	2013-11-02 22:37:51	Parent	Yes	Yes	No	Yes	Unchecked	Unchecked	Unchecked	Checked	Unchecked	Unchecked
93	2013-11-03 11:13:53	Parent	No	Yes	No	Yes	Checked	Unchecked	Unchecked	Unchecked	Unchecked	Unchecked
94	2013-11-05 13:23:22	Parent	No	Yes	No	Yes	Unchecked	Unchecked	Unchecked	Unchecked	Unchecked	Checked
95	2013-11-05 17:42:15	Parent	No	Yes	No	Yes	Unchecked	Unchecked	Unchecked	Unchecked	Unchecked	Checked
99	2013-11-14 18:02:00	Parent	Missing	Missing	Missing	Missing	Checked	Checked	Checked	Checked	Checked	Checked
100	2013-11-15 20:16:54	Parent	No	No	Yes	Yes	Unchecked	Checked	Unchecked	Unchecked	Unchecked	Unchecked
103	2013-11-16 23:14:33	Parent	No	Yes	No	Yes	Unchecked	Unchecked	Unchecked	Unchecked	Unchecked	Checked
104	2013-11-18 09:20:40	Parent	No	Yes	No	Yes	Unchecked	Unchecked	Unchecked	Unchecked	Unchecked	Checked
106	2013-11-18 16:51:05	Parent	Yes	Yes	No	Yes	Unchecked	Unchecked	Checked	Unchecked	Unchecked	Unchecked
107	2013-11-18 17:07:12	Parent	No	Yes	No	Yes	Unchecked	Checked	Unchecked	Unchecked	Unchecked	Unchecked
111	2013-11-20 20:49:34	Parent	Yes	Yes	No	Yes	Unchecked	Unchecked	Checked	Unchecked	Unchecked	Unchecked
112	2013-11-21 22:08:05	Parent	No	Yes	No	No	Unchecked	Checked	Unchecked	Unchecked	Unchecked	Unchecked
113	2013-11-22 14:48:08	Parent	Yes	Yes	No	No	Unchecked	Unchecked	Unchecked	Unchecked	Checked	Unchecked
120	2013-12-09 14:17:59	Parent	No	No	No	No	Unchecked	Unchecked	Unchecked	Unchecked	Checked	Unchecked
123	2013-12-10 20:26:12	Parent	No	Yes	No	Yes	Checked	Unchecked	Unchecked	Unchecked	Unchecked	Unchecked
126	2013-12-17 10:35:38	Parent	Yes	Yes	Yes	Yes	Checked	Unchecked	Unchecked	Unchecked	Unchecked	Unchecked
128	2013-12-17 19:30:06	Parent	Yes	No	Yes	Yes	Unchecked	Unchecked	Checked	Unchecked	Unchecked	Unchecked
129	2013-12-23 12:00:09	Parent	No	No	No	No	Unchecked	Unchecked	Unchecked	Unchecked	Checked	Unchecked
132	2014-01-12 19:12:05	Parent	No	No	No	Yes	Unchecked	Unchecked	Unchecked	Unchecked	Checked	Unchecked
134	2014-01-21 16:00:29	Parent	No	Yes	No	No	Unchecked	Checked	Unchecked	Unchecked	Unchecked	Unchecked
139	2014-03-05 16:22:21	Parent	Yes	Yes	No	Yes	Unchecked	Unchecked	Unchecked	Unchecked	Checked	Unchecked
141	2014-03-12 15:47:13	Parent	No	Yes	No	Yes	Unchecked	Checked	Unchecked	Unchecked	Unchecked	Unchecked
144	2014-04-19 16:39:14	Parent	Yes	Yes	No	Yes	Unchecked	Unchecked	Checked	Unchecked	Unchecked	Unchecked
145	2014-04-24 13:50:25	Parent	Yes	Yes	No	Yes	Unchecked	Unchecked	Unchecked	Checked	Unchecked	Unchecked
149	2014-06-06 16:46:18	Parent	No	Yes	No	Yes	Unchecked	Unchecked	Checked	Unchecked	Unchecked	Unchecked
152	2014-06-07 19:42:31	Parent	No	Yes	No	Yes	Unchecked	Checked	Checked	Checked	Unchecked	Unchecked
155	2014-06-21 08:39:22	Parent	No	Yes	No	No	Unchecked	Unchecked	Unchecked	Unchecked	Unchecked	Checked
156	2014-06-21 16:38:35	Parent	Yes	Yes	No	No	Unchecked	Checked	Unchecked	Unchecked	Unchecked	Unchecked
159	2014-06-25 21:46:55	Parent	Yes	Yes	No	No	Unchecked	Unchecked	Unchecked	Unchecked	Checked	Unchecked
161	2014-08-05 10:56:39	Parent	Yes	Yes	No	Yes	Unchecked	Unchecked	Unchecked	Checked	Unchecked	Unchecked
162	2014-09-18 15:07:03	Parent	No	Yes	No	No	Checked	Unchecked	Unchecked	Unchecked	Unchecked	Unchecked
163	2014-09-19 17:55:51	Parent	No	Yes	No	Yes	Unchecked	Checked	Unchecked	Unchecked	Unchecked	Unchecked

## Sheet: Health Care Provider Data
S2 Table.							How did you find this video? (check all that apply)
Participant ID	Date and time completed	Are you a health care provider or parent?	In your practice do you encourage mothers to breastfeed their infants during immunizations?	After viewing this video, would you encourage mothers to breastfeed their infants during immunizations?	In your practice do you routinely give sucrose to infants prior to / during immunizations?	After viewing this video, would you use sucrose for infants prior to/during immunizations?	Searching YouTube	Family Friend	Health Care Professional	Facebook/Twitter/Email	CHEO website	Other
3	2013-10-21 10:20:50	HCP	Yes	Yes	Yes	Yes	Unchecked	Unchecked	Checked	Unchecked	Unchecked	Unchecked
4	2013-10-21 10:48:32	HCP	Yes	Yes	Yes	Yes	Unchecked	Unchecked	Unchecked	Unchecked	Checked	Unchecked
5	2013-10-21 11:12:17	HCP	Yes	Yes	Yes	Yes	Unchecked	Unchecked	Checked	Unchecked	Unchecked	Unchecked
9	2013-10-21 13:28:25	HCP	No	Yes	No	Missing	Unchecked	Checked	Unchecked	Unchecked	Unchecked	Unchecked
10	2013-10-21 13:57:10	HCP	No	Yes	No	Yes	Unchecked	Unchecked	Checked	Unchecked	Unchecked	Unchecked
11	2013-10-21 14:47:09	HCP	Yes	Yes	No	Yes	Unchecked	Unchecked	Unchecked	Unchecked	Unchecked	Checked
14	2013-10-21 16:05:14	HCP	No	Yes	No	Yes	Unchecked	Unchecked	Checked	Unchecked	Unchecked	Unchecked
20	2013-10-21 21:01:45	HCP	No	Yes	No	Yes	Unchecked	Unchecked	Checked	Unchecked	Unchecked	Unchecked
21	2013-10-22 00:34:53	HCP	Yes	Yes	No	Yes	Unchecked	Unchecked	Checked	Unchecked	Unchecked	Unchecked
25	2013-10-22 10:11:35	HCP	Yes	Missing	Missing	Missing	Unchecked	Unchecked	Unchecked	Unchecked	Unchecked	Unchecked
26	2013-10-22 10:30:20	HCP	No	Yes	No	Yes	Unchecked	Unchecked	Unchecked	Unchecked	Unchecked	Checked
27	2013-10-22 10:46:43	HCP	No	Yes	No	Yes	Unchecked	Unchecked	Unchecked	Checked	Unchecked	Checked
28	2013-10-22 10:47:06	HCP	Yes	Yes	Yes	Yes	Unchecked	Unchecked	Unchecked	Checked	Unchecked	Unchecked
29	2013-10-22 11:02:26	HCP	Yes	Yes	Yes	Yes	Unchecked	Unchecked	Unchecked	Checked	Unchecked	Unchecked
30	2013-10-22 11:32:04	HCP	Yes	Yes	No	No	Unchecked	Unchecked	Unchecked	Checked	Unchecked	Unchecked
31	2013-10-22 11:44:39	HCP	No	Yes	No	Yes	Unchecked	Unchecked	Checked	Unchecked	Unchecked	Checked
32	2013-10-22 11:58:58	HCP	Yes	Yes	Yes	Yes	Unchecked	Unchecked	Unchecked	Unchecked	Unchecked	Checked
34	2013-10-22 14:36:02	HCP	Yes	Yes	Yes	Yes	Unchecked	Unchecked	Checked	Unchecked	Unchecked	Unchecked
36	2013-10-22 15:41:45	HCP	No	Yes	Missing	Missing	Unchecked	Unchecked	Unchecked	Unchecked	Unchecked	Checked
37	2013-10-22 16:29:27	HCP	Yes	Yes	No	Yes	Unchecked	Unchecked	Checked	Unchecked	Unchecked	Unchecked
40	2013-10-22 18:19:22	HCP	Yes	Yes	Yes	Yes	Unchecked	Unchecked	Unchecked	Unchecked	Unchecked	Checked
42	2013-10-22 19:49:18	HCP	No	No	No	No	Unchecked	Unchecked	Checked	Unchecked	Unchecked	Unchecked
43	2013-10-22 20:31:35	HCP	Yes	Yes	No	Yes	Unchecked	Unchecked	Checked	Unchecked	Unchecked	Unchecked
44	2013-10-22 21:04:56	HCP	Missing	Yes	Yes	Yes	Unchecked	Unchecked	Checked	Unchecked	Unchecked	Unchecked
47	2013-10-22 21:32:04	HCP	Yes	Yes	No	Yes	Unchecked	Unchecked	Checked	Unchecked	Unchecked	Unchecked
48	2013-10-22 22:34:29	HCP	Yes	Yes	Yes	Yes	Unchecked	Unchecked	Checked	Unchecked	Unchecked	Unchecked
50	2013-10-23 08:44:32	HCP	No	Yes	No	Yes	Unchecked	Unchecked	Checked	Unchecked	Unchecked	Unchecked
51	2013-10-23 08:45:53	HCP	Yes	Yes	No	Yes	Unchecked	Checked	Unchecked	Unchecked	Unchecked	Unchecked
54	2013-10-23 10:22:32	HCP	No	Yes	No	Yes	Unchecked	Unchecked	Checked	Unchecked	Unchecked	Unchecked
55	2013-10-23 10:43:03	HCP	No	Yes	No	Yes	Unchecked	Unchecked	Checked	Unchecked	Unchecked	Unchecked
56	2013-10-23 11:35:35	HCP	No	Yes	Yes	Yes	Unchecked	Checked	Unchecked	Checked	Unchecked	Unchecked
57	2013-10-23 12:14:57	HCP	No	Yes	No	Yes	Unchecked	Unchecked	Checked	Unchecked	Unchecked	Checked
58	2013-10-23 12:38:35	HCP	Yes	Yes	No	Yes	Unchecked	Unchecked	Checked	Unchecked	Checked	Unchecked
60	2013-10-23 14:00:16	HCP	Yes	Yes	Yes	Yes	Unchecked	Unchecked	Checked	Unchecked	Unchecked	Unchecked
61	2013-10-23 14:19:04	HCP	No	Yes	Yes	Yes	Unchecked	Unchecked	Unchecked	Unchecked	Unchecked	Unchecked
62	2013-10-23 16:33:07	HCP	Yes	Yes	No	Yes	Unchecked	Unchecked	Unchecked	Checked	Unchecked	Unchecked
63	2013-10-23 16:59:13	HCP	No	Yes	Yes	Yes	Unchecked	Unchecked	Unchecked	Checked	Unchecked	Unchecked
66	2013-10-24 08:52:29	HCP	Yes	Yes	Yes	Yes	Unchecked	Unchecked	Unchecked	Unchecked	Checked	Unchecked
67	2013-10-24 09:35:22	HCP	No	Yes	No	Yes	Unchecked	Unchecked	Checked	Unchecked	Unchecked	Unchecked
69	2013-10-24 10:29:43	HCP	Yes	Yes	No	Yes	Unchecked	Unchecked	Unchecked	Unchecked	Unchecked	Checked
70	2013-10-24 11:25:04	HCP	Yes	Yes	No	Yes	Unchecked	Unchecked	Checked	Unchecked	Unchecked	Unchecked
71	2013-10-24 13:31:45	HCP	Yes	Yes	No	Yes	Unchecked	Unchecked	Checked	Unchecked	Unchecked	Unchecked
72	2013-10-24 13:53:21	HCP	Yes	Yes	Yes	Yes	Unchecked	Unchecked	Unchecked	Unchecked	Checked	Unchecked
76	2013-10-24 18:08:41	HCP	Yes	Yes	Yes	Yes	Unchecked	Unchecked	Unchecked	Unchecked	Unchecked	Checked
77	2013-10-24 18:50:41	HCP	Yes	Yes	No	Yes	Unchecked	Unchecked	Checked	Unchecked	Unchecked	Unchecked
78	2013-10-24 19:12:57	HCP	Yes	Yes	Yes	Yes	Unchecked	Unchecked	Checked	Unchecked	Unchecked	Unchecked
79	2013-10-25 02:49:12	HCP	No	Yes	Yes	Yes	Unchecked	Unchecked	Checked	Unchecked	Unchecked	Unchecked
81	2013-10-25 06:18:25	HCP	No	Yes	No	Yes	Unchecked	Unchecked	Checked	Unchecked	Unchecked	Unchecked
84	2013-10-26 04:19:51	HCP	No	Yes	Yes	Yes	Unchecked	Unchecked	Checked	Unchecked	Unchecked	Unchecked
85	2013-10-26 17:32:30	HCP	No	Yes	Yes	Yes	Unchecked	Unchecked	Checked	Unchecked	Unchecked	Unchecked
86	2013-10-26 22:49:45	HCP	Yes	Yes	Yes	Yes	Unchecked	Unchecked	Checked	Unchecked	Unchecked	Unchecked
87	2013-10-27 13:39:36	HCP	Yes	Yes	Yes	Yes	Unchecked	Unchecked	Unchecked	Unchecked	Unchecked	Checked
89	2013-10-30 14:34:07	HCP	Yes	Yes	No	Yes	Unchecked	Unchecked	Checked	Unchecked	Unchecked	Unchecked
91	2013-11-03 05:43:13	HCP	No	Yes	No	Yes	Unchecked	Unchecked	Checked	Unchecked	Unchecked	Unchecked
92	2013-11-03 09:46:50	HCP	Yes	Yes	No	Yes	Unchecked	Unchecked	Checked	Unchecked	Unchecked	Unchecked
96	2013-11-06 12:58:06	HCP	No	Yes	No	Yes	Unchecked	Unchecked	Unchecked	Unchecked	Unchecked	Checked
97	2013-11-07 07:45:59	HCP	No	Yes	No	Yes	Unchecked	Checked	Checked	Unchecked	Unchecked	Unchecked
101	2013-11-16 00:49:18	HCP	Yes	Yes	Yes	Yes	Unchecked	Unchecked	Checked	Unchecked	Unchecked	Unchecked
102	2013-11-16 18:49:57	HCP	Yes	Yes	Yes	Yes	Unchecked	Unchecked	Checked	Unchecked	Unchecked	Unchecked
105	2013-11-18 11:08:34	HCP	No	Yes	Yes	Yes	Unchecked	Checked	Unchecked	Unchecked	Unchecked	Unchecked
108	2013-11-18 23:54:58	HCP	No	Yes	No	Yes	Unchecked	Unchecked	Checked	Unchecked	Unchecked	Unchecked
109	2013-11-19 12:34:49	HCP	Yes	Yes	Yes	Yes	Checked	Unchecked	Checked	Unchecked	Unchecked	Unchecked
110	2013-11-20 14:54:37	HCP	No	Yes	No	Yes	Unchecked	Unchecked	Checked	Unchecked	Unchecked	Unchecked
114	2013-11-23 01:17:10	HCP	Yes	Yes	Yes	Yes	Unchecked	Unchecked	Checked	Unchecked	Unchecked	Unchecked
115	2013-12-02 16:15:51	HCP	Yes	Yes	Yes	Yes	Unchecked	Unchecked	Unchecked	Unchecked	Checked	Unchecked
116	2013-12-02 20:08:14	HCP	No	Yes	No	Yes	Unchecked	Unchecked	Checked	Unchecked	Unchecked	Unchecked
117	2013-12-05 08:19:38	HCP	No	Yes	No	Yes	Unchecked	Unchecked	Unchecked	Unchecked	Unchecked	Checked
118	2013-12-05 17:34:00	HCP	Yes	Yes	No	No	Unchecked	Unchecked	Checked	Unchecked	Unchecked	Unchecked
119	2013-12-06 14:22:58	HCP	No	Yes	Yes	Yes	Unchecked	Unchecked	Checked	Unchecked	Unchecked	Unchecked
121	2013-12-09 17:30:36	HCP	Yes	Missing	Yes	Yes	Unchecked	Unchecked	Unchecked	Unchecked	Unchecked	Checked
122	2013-12-10 09:01:47	HCP	No	Yes	Yes	Yes	Unchecked	Unchecked	Unchecked	Unchecked	Checked	Unchecked
124	2013-12-16 02:56:11	HCP	No	No	No	Yes	Unchecked	Unchecked	Checked	Unchecked	Unchecked	Unchecked
125	2013-12-17 00:40:31	HCP	No	No	No	No	Unchecked	Unchecked	Checked	Unchecked	Unchecked	Unchecked
127	2013-12-17 17:53:48	HCP	Yes	Yes	No	Yes	Unchecked	Unchecked	Checked	Unchecked	Unchecked	Unchecked
130	2013-12-29 16:19:34	HCP	No	Yes	No	Yes	Unchecked	Unchecked	Checked	Unchecked	Unchecked	Unchecked
131	2014-01-03 09:51:27	HCP	Yes	Yes	No	No	Unchecked	Unchecked	Checked	Unchecked	Unchecked	Unchecked
133	2014-01-18 18:30:53	HCP	Yes	Yes	No	Yes	Unchecked	Unchecked	Checked	Unchecked	Unchecked	Unchecked
135	2014-02-12 23:07:11	HCP	Yes	Yes	Yes	Yes	Unchecked	Unchecked	Unchecked	Checked	Unchecked	Unchecked
136	2014-02-16 17:31:37	HCP	Yes	Yes	No	Yes	Unchecked	Unchecked	Unchecked	Unchecked	Unchecked	Checked
137	2014-02-26 01:35:46	HCP	Yes	Yes	No	Yes	Unchecked	Unchecked	Unchecked	Unchecked	Unchecked	Checked
138	2014-02-26 21:08:19	HCP	Yes	Yes	Yes	Yes	Unchecked	Unchecked	Checked	Unchecked	Unchecked	Unchecked
140	2014-03-06 20:24:19	HCP	No	Yes	No	Yes	Unchecked	Unchecked	Checked	Unchecked	Unchecked	Unchecked
142	2014-03-18 18:38:26	HCP	Yes	Yes	No	Yes	Checked	Unchecked	Checked	Checked	Unchecked	Unchecked
146	2014-05-13 11:17:15	HCP	Yes	Yes	Yes	Yes	Unchecked	Unchecked	Checked	Unchecked	Unchecked	Unchecked
147	2014-05-25 07:26:34	HCP	No	Yes	Yes	Yes	Checked	Unchecked	Unchecked	Unchecked	Unchecked	Unchecked
148	2014-05-29 14:24:34	HCP	Yes	Yes	Yes	Yes	Unchecked	Unchecked	Unchecked	Unchecked	Unchecked	Checked
150	2014-06-07 19:34:55	HCP	Yes	Yes	Yes	Yes	Unchecked	Unchecked	Unchecked	Unchecked	Unchecked	Checked
153	2014-06-11 15:25:13	HCP	Yes	Yes	No	Yes	Unchecked	Unchecked	Unchecked	Unchecked	Checked	Checked
157	2014-06-24 23:45:15	HCP	Yes	Yes	Yes	Yes	Unchecked	Unchecked	Checked	Unchecked	Unchecked	Unchecked
158	2014-06-25 15:38:00	HCP	Yes	Yes	No	Yes	Unchecked	Unchecked	Checked	Unchecked	Checked	Checked
